# Supplementary material for: miR-135b Stimulates Osteosarcoma Recurrence and Lung Metastasis via Notch and Wnt/β-Catenin Signaling
Source: PubMed Central journal article supplement — Mol Ther Nucleic Acids. 2017 Jun 15;8:111–22. doi: 10.1016/j.omtn.2017.06.008 (PMC5493819; doi:10.1016/j.omtn.2017.06.008), 2017-06-15
Supplement: mmc1.pdf [file mmc1.pdf]

OMTN, Volume 8

## Supplemental Information

### **miR-135b Stimulates Osteosarcoma Recurrence and Lung Metastasis via Notch and Wnt/ $\beta$ -Catenin Signaling**

**Hua Jin, Song Luo, Yun Wang, Chang Liu, Zhenghao Piao, Meng Xu, Wei Guan, Qing Li, Hua Zou, Qun-You Tan, Zhen-Zhou Yang, Yan Wang, Dong Wang, and Cheng-Xiong Xu**

**A**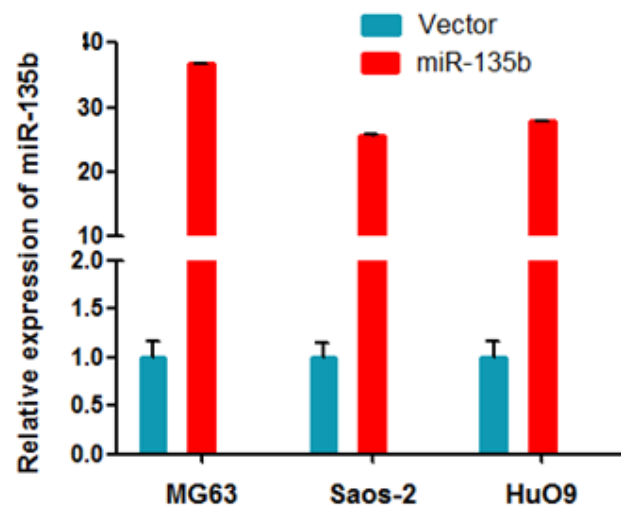**B**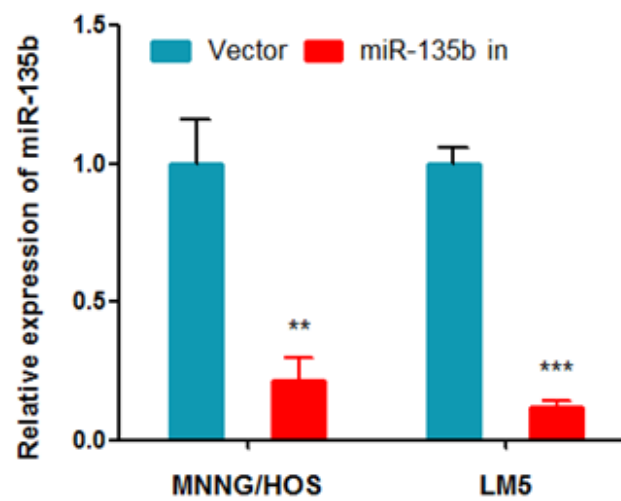**Figure S1**

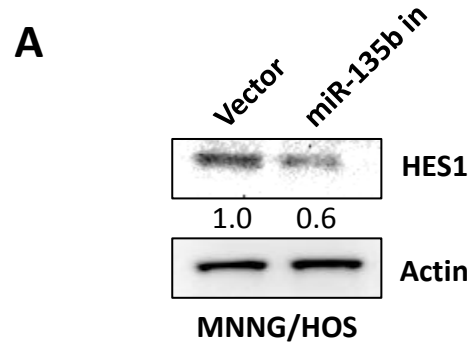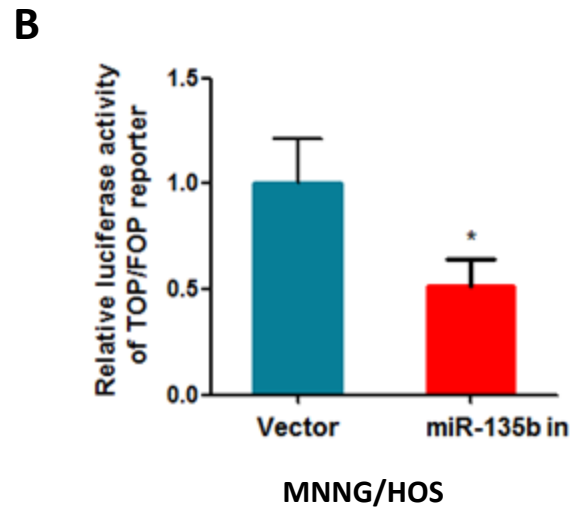

Figure S2

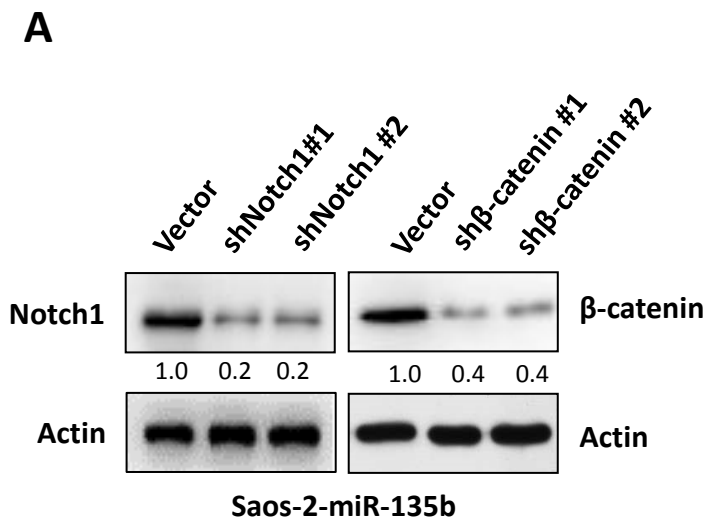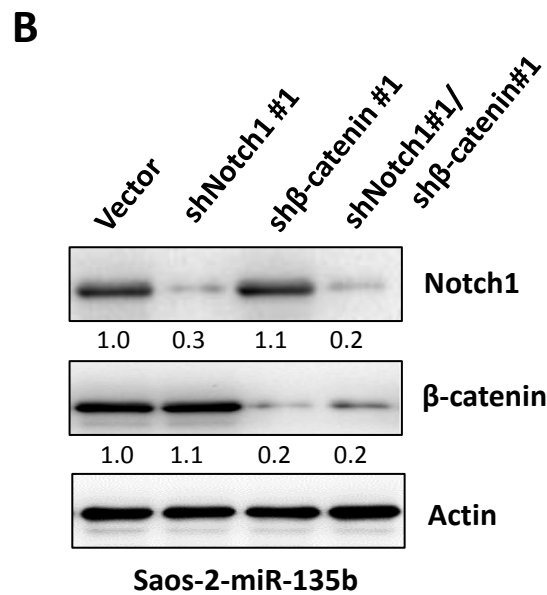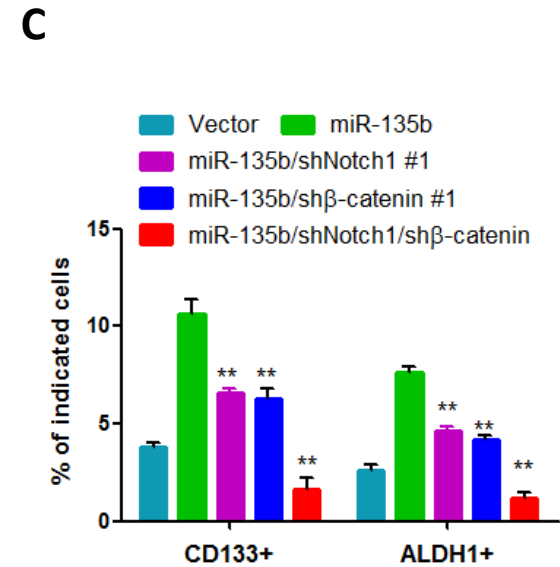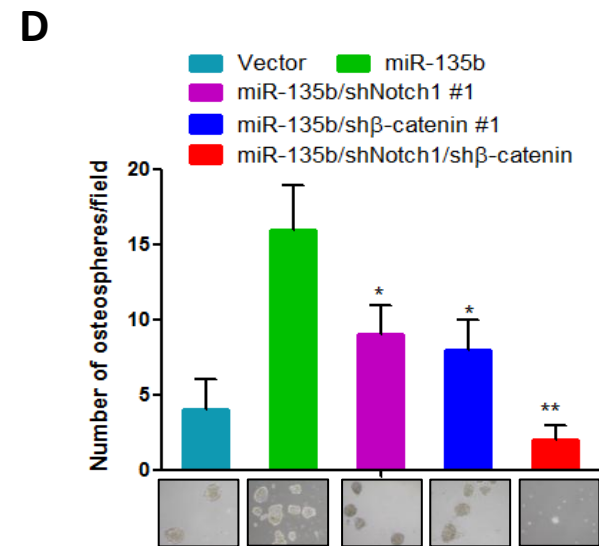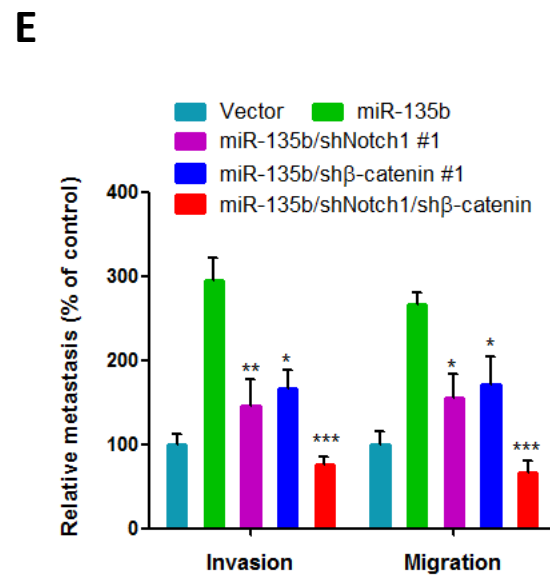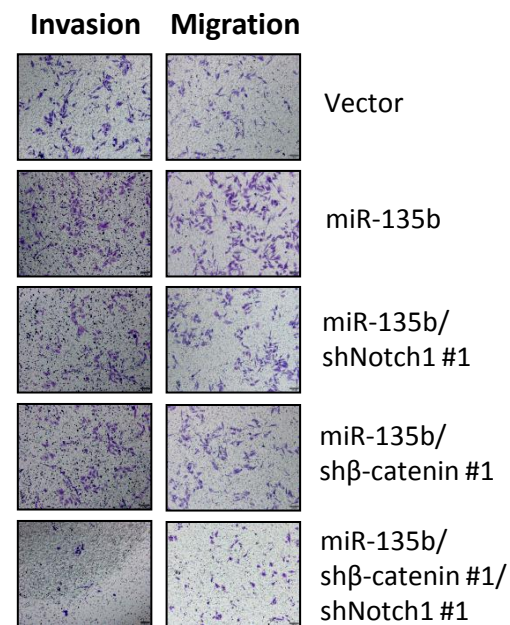

**Figure S3.**

**F**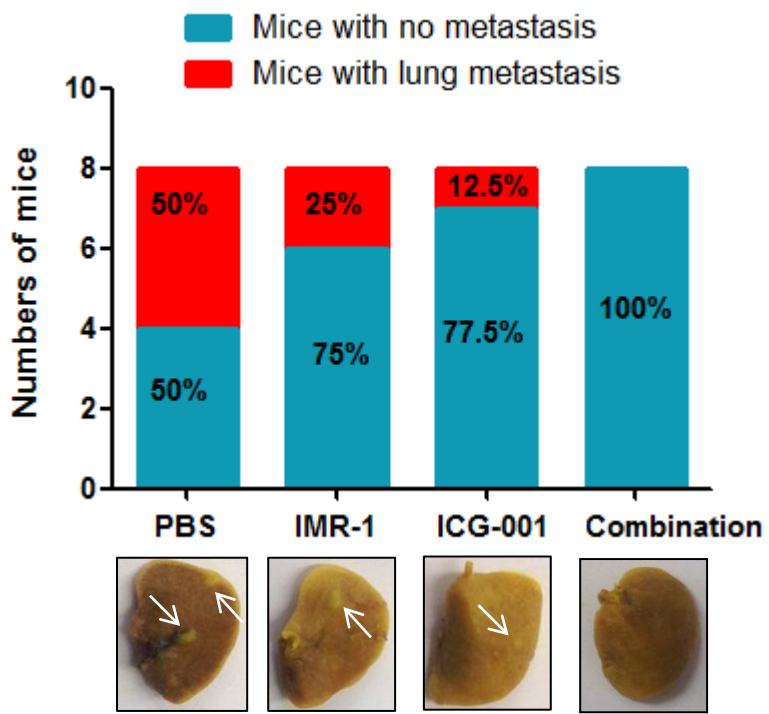**G**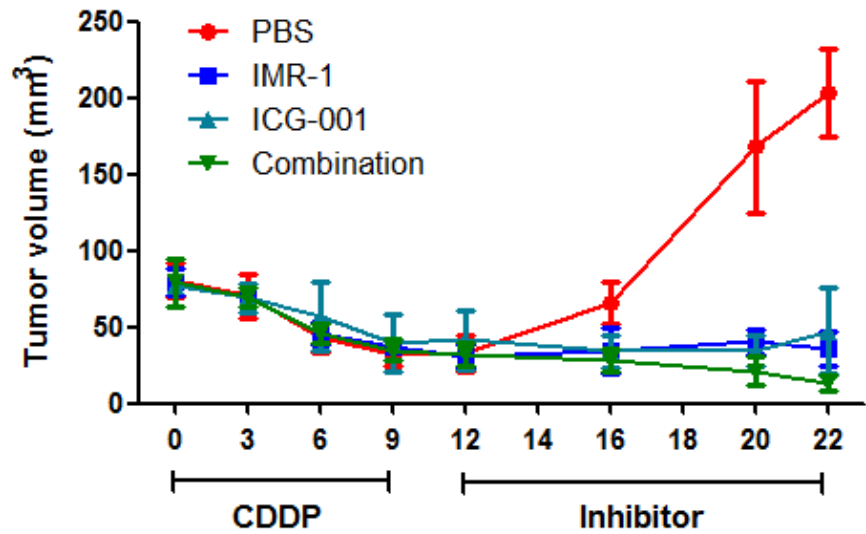**Figure S3.**

**A**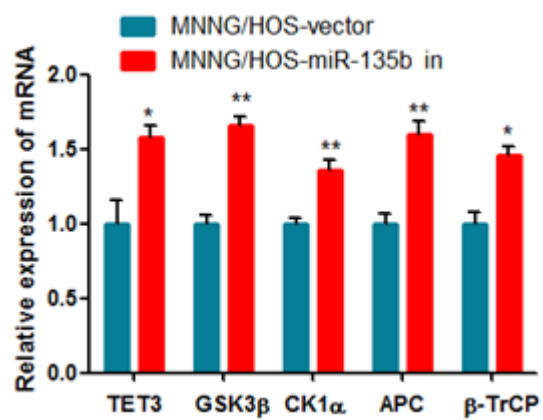**B**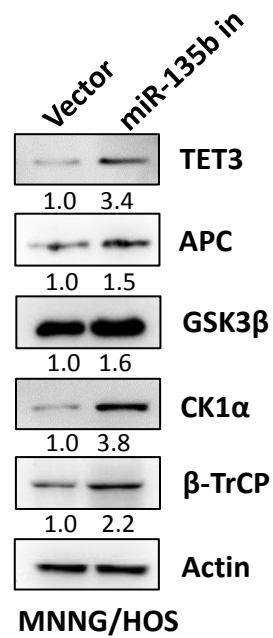**C**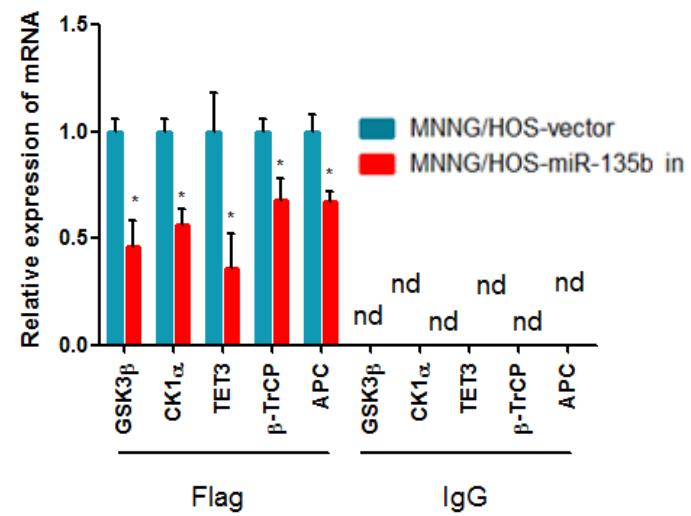**Figure S4**

**A**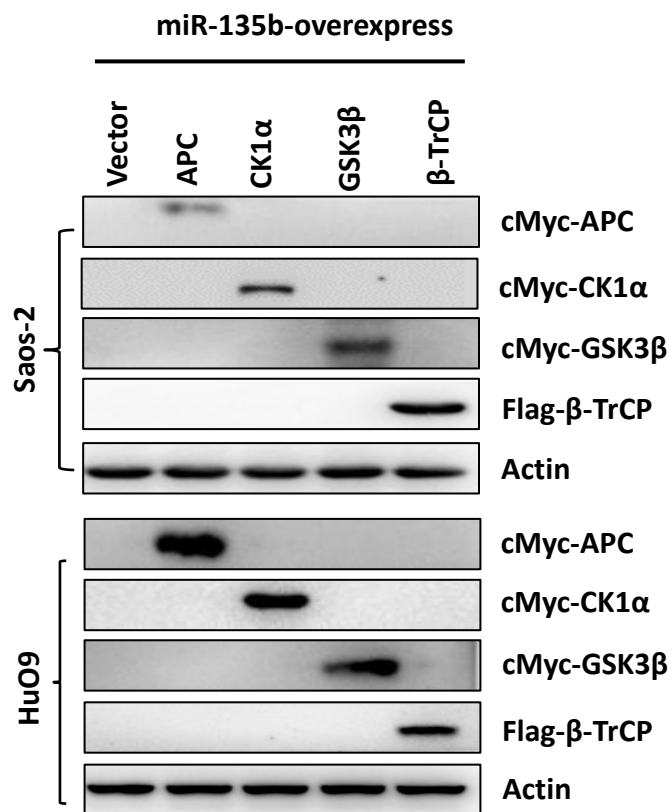**B**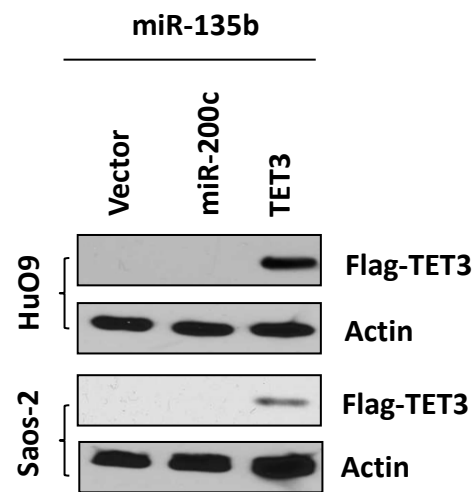**C**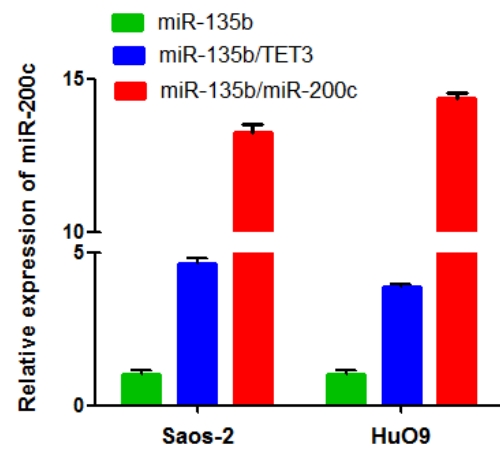**Figure S5.**

## Supplementary Figure legends

**Figure S1. The miR-135b expression level was measured in the indicated cells using RT-qPCR.** (A) miR-135b expression was significantly increased in the indicated OS cells that stably expressed miR-135b compared with their corresponding vector control cells. (B) miR-135b was significantly decreased in the indicated cells that stably expressed miR-135b antisense (miR-135b in) compared with the vector control.

**Figure S2. Inhibition of miR-135b inhibits Notch1 and Wnt/ $\beta$ -catenin signaling in MNNG/HOS cells.** (A) The expression of HES1 was decreased in MNNG/HOS cells that stably expressed miR-135b antisense (miR-135b in) compared with the vector control. (B) The indicated cells were transfected with TOP or FOP reporter and Renilla pRL-TK plasmids and were subjected to dual-luciferase assays 48 hours after transfection. The reporter activity was normalized to the activity of Renilla luciferase.

**Figure S3. Silencing of Notch1 and  $\beta$ -catenin inhibits miR135b-induced stemness and metastasis in Saos-2 cells.** (A) miR-135b-transduced Saos-2 cells (Saos-2-miR-135b) were transfected with shRNA against the indicated genes, and the expression of the indicated proteins was measured by Western blot 72 hours after transfection. (B) Saos-2 cells that stably expressed miR135b were transfected with Notch1 and/or  $\beta$ -catenin shRNA, and the expression of the indicated proteins was measured by Western blot 72 hours after transfection. (C) The silencing of Notch1 and/or  $\beta$ -catenin significantly inhibited miR-135b-induced CD133- or ALDH1-positive populations of Saos-2 cells. (D) The silencing of Notch1 and/or  $\beta$ -catenin significantly inhibited miR-135b-induced sphere formation of Saos-2 cells. (E) The silencing of Notch1 and/or  $\beta$ -catenin significantly inhibited the miR-135b-induced invasion and migration of Saos-2 cells. (F)  $4 \times 10^5$  miR-135b overexpressing Saos-2 cells in 150  $\mu$ l of serum-free medium were injected to 6-weeks old female nude mice through tail vein (n=8 per group). After 1 week of tumor cell



injection, mice were treated with IMR-1 (Notch inhibitor, 15mg/Kg body weight) or/and ICG-001 (Wnt signaling inhibitor, 5mg/Kg body weight) by intraperitoneal injection every 2 days for 3 weeks. Then, mice were sacrificed and determined the OS cell lung metastasis. (G)  $5 \times 10^6$  miR-135b stably transduced Saos-2 cells, in serum-free medium were subcutaneously injected into 6-weeks old female nude mice. When the tumors reached a volume of  $\sim 72 \text{ mm}^3$ , all mice were treated with CDDP (5 mg/kg body weight) by intraperitoneal injection every 3 days for 12 days. After 3 days of stop CDDP treatment, mice were treated with IMR-1 (15mg/Kg body weight) or/and ICG-001 (5mg/Kg body weight) by intraperitoneal injection 2 days for 10 days (n=5 per group).

**Figure S4. Inhibition of miR135b causes increased expression of miR-135b target genes in MNNG/HOS cells.** The expression levels of miR-135b target genes were increased in MNNG/HOS cells that stably expressed miR-135b antisense (miR-135b in) at the (A) mRNA and (B) protein levels compared with vector control cells. (C) RIP analysis revealed that mRNAs of the indicated genes were recruited to miRNAP complexes following immunoprecipitation with flag. IgG immunoprecipitation was used as a negative control. (nd: non detected)

**Figure S5.** The indicated cells were transfected with the indicated genes, and the expression of these genes was detected by Western blot (A and B) and RT-qPCR (C) 72 hours after transfection.

**Table S1. Demographics and clinical variables**

| Clinical Variables       | miR-135b High |      | miR-135b Low |      | <i>p</i> |
|--------------------------|---------------|------|--------------|------|----------|
|                          | No.           | %    | No.          | %    |          |
| Total patients           | 56            |      | 56           |      |          |
| Gender                   |               |      |              |      | 0.567    |
| male                     | 34            | 60.7 | 30           | 53.6 |          |
| female                   | 22            | 39.3 | 26           | 46.4 |          |
| Age                      |               |      |              |      | 0.910    |
| Mean                     | 19.7          |      | 20           |      |          |
| Range                    | 4-51          |      | 6-49         |      |          |
| Anatomical site          |               |      |              |      | 0.836    |
| Femure                   | 31            | 55.4 | 25           | 44.6 |          |
| Tibia                    | 10            | 17.9 | 11           | 19.6 |          |
| Humerus                  | 5             | 8.9  | 7            | 12.5 |          |
| Pelvis                   | 5             | 8.9  | 7            | 12.5 |          |
| Other                    | 5             | 8.9  | 6            | 10.7 |          |
| Histologic subtype       |               |      |              |      | 0.959    |
| Osteoblastic             | 35            | 62.5 | 38           | 67.9 |          |
| Chondroblastic           | 6             | 10.7 | 6            | 10.7 |          |
| Fibroblastic             | 4             | 7.1  | 4            | 7.1  |          |
| Telangiectatic           | 5             | 8.9  | 4            | 7.1  |          |
| Other                    | 6             | 10.7 | 4            | 7.1  |          |
| Histologic grade         |               |      |              |      | 0.415    |
| III                      | 20            | 35.7 | 15           | 26.8 |          |
| IV                       | 36            | 64.3 | 41           | 73.2 |          |
| Ennecking grade          |               |      |              |      | 0.267    |
| 2a                       | 10            | 17.9 | 5            | 8.9  |          |
| 2b                       | 46            | 82.1 | 51           | 91.1 |          |
| Response to chemotherapy |               |      |              |      | 0.041    |
| GR                       | 33            | 58.9 | 44           | 78.6 |          |
| PR                       | 23            | 41.1 | 12           | 21.4 |          |

GR: good response; PR: poor response.

**Table S2. The sequences of primers used in RT-qPCR**

| Gene Symbol   | Forward                  | Reverse                  |
|---------------|--------------------------|--------------------------|
| GSK3 $\beta$  | GACTAAGGTCTTCCGACCCC-3'  | TTAGCATCTGACGCTGCTGT-3'  |
| APC           | GGAAGCAGAGAAAGTACTGGA    | CTGAAGTTGAGCGTAATACCAG   |
| CK1 $\alpha$  | AGTGGCAGTGAAGCTAGAATCT   | CGCCCAATACCCATTAGGAAGTT  |
| $\beta$ -TrCP | CCAGACTCTGCTTAAACCAAGAA  | GGGCACAATCATACTGGAAGTG   |
| TET3          | TCACCGACACCCTCCGGAAGTATG | TGCAGCCGTTGAAGTACATGCTCC |
| HES1          | AGGCGGACATTCTGGAAATG     | CGGTACTTCCCAGCACACTT     |
| GAPDH         | ATTCCATGGCACCGTCAAGGCTGA | TTCTCCATGGTGGTGAAGACGCCA |

**Table S3. Univariate and multivariable analyses of factors predictive of poor overall survival in osteosarcoma patients**

| Variable                 | Univariate analysis |          | Multivariate analysis |          |
|--------------------------|---------------------|----------|-----------------------|----------|
|                          | HR (95% CI)         | <i>p</i> | HR (95% CI)           | <i>p</i> |
| Gender                   | 1.170(0.64-2.16)    | 0.62     | 1.06 (0.53-2.12)      | 0.87     |
| Age                      | 1.00(0.97-1.02)     | 0.71     | 0.98 (0.95-1.01)      | 0.22     |
| Anatomical site          |                     | 0.96     |                       | 0.98     |
| Histologic subtype       |                     | 0.28     |                       | 0.42     |
| Histologic grade         | 0.70 (0.35-1.38)    | 0.30     | 1.14 (0.49-2.65)      | 0.77     |
| Enneking grade           | 2.53 (0.78-8.19)    | 0.12     | 0.61 (0.15-2.45)      | 0.48     |
| miR-135b                 | 2.04 (1.10-3.79)    | 0.02     | 0.47 (0.24-0.92)      | 0.03     |
| Response to chemotherapy | 3.29 (1.80-6.00)    | 0.00     | 0.24 (0.11-0.51)      | 0.00     |
